# Supplementary material for: Blood-perfused Vessels-on-Chips stimulated with patient plasma recapitulate endothelial activation and microthrombosis in COVID-19
Source: Royal Society of Chemistry journal article supplement (doi:10.1039/d4lc00848k), 2025-01-01
Supplement: d4lc00848k1.pdf [file d4lc00848k1.pdf]

Supplement COVID paper

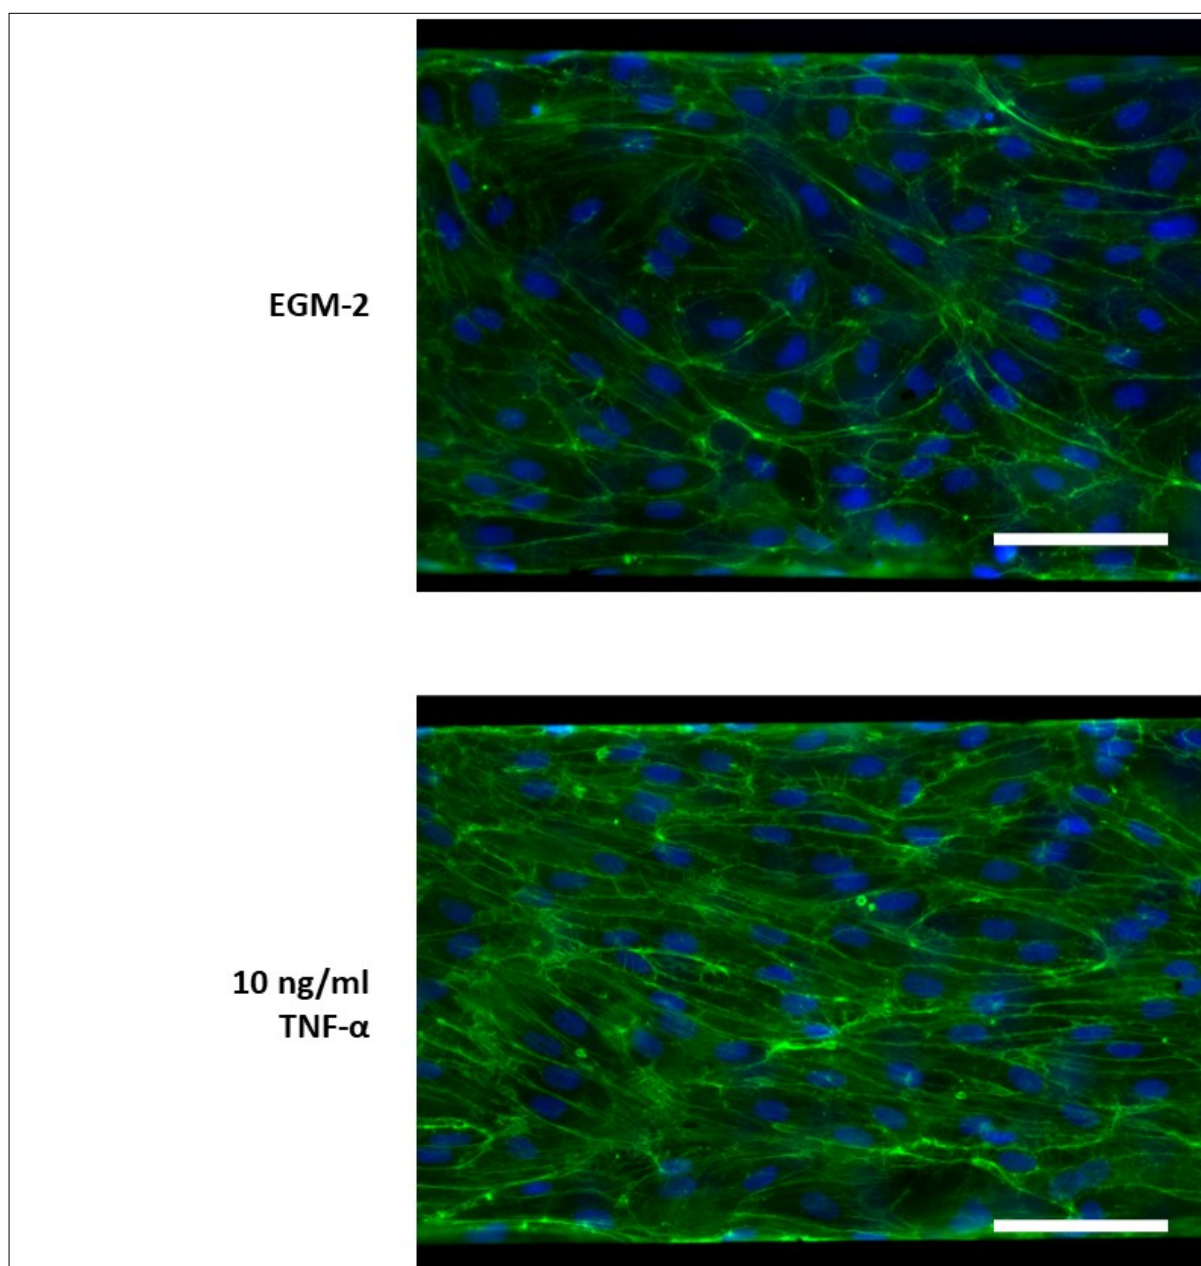

Figure S1: Comparison of Actin filaments (Green) in healthy EGM-2 vs Inflamed (10 ng/ml TNF- $\alpha$ ) conditions. Nuclei stained in blue. Scale bar: 100  $\mu$ m.

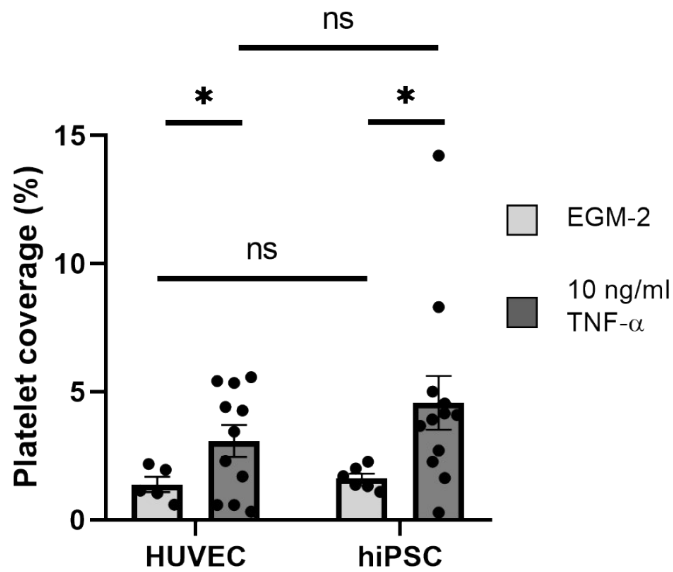

Figure S2: Platelet coverage in healthy (EGM-2) and inflamed (TNF- $\alpha$ ) conditions in HUVECs and hiPSC-ECs. Platelet coverage is determined using image analysis of fluorescence microscopy data. Error bars: SEM. \*  $p < 0.05$ .

Table S1: Baseline characteristics of patient plasma donors

| Parameter                                     | SARS-COV-2 PCR positive (n=12) | Healthy donors (n=12) | SARS-COV-2 PCR negative (n=2) |
|-----------------------------------------------|--------------------------------|-----------------------|-------------------------------|
| Gender male, n (%)                            | 5 (42)                         | 5 (42)                | 0 (0)                         |
| Age, years (mean (SD))                        | 62.50 (12.67)                  | 25.5 (3.23)           | 35.50 (19.09)                 |
| BMI (mean (SD))                               | 30.40 (7.33)                   | N.A.                  | 15.93 (NA)                    |
| PCR_COVID = positive (%)                      | 12 (100)                       | N.A.                  | 0 (0)                         |
| Weight, kg (mean (SD))                        | 91.21 (21.99)                  | N.A.                  | 56.90 (12.87)                 |
| Hb level at admission, mmol/L (mean (SD))     | 7.92 (1.02)                    | N.A.                  | 6.20 (0.14)                   |
| Lymphocytes level at admission (median [IQR]) | 1.11 [1.00, 1.35]              | N.A.                  | 1.51 [1.19, 1.84]             |
| Neutrophils at admission (mean (SD))          | 5.60 (2.18)                    | N.A.                  | 11.39 (NA)                    |
| Platelet at admission (mean (SD))             | 244.00 (83.43)                 | N.A.                  | 471.50 (136.47)               |
| Creatine level at admission (mean (SD))       | 83.67 (31.17)                  | N.A.                  | 59.50 (7.78)                  |
| D-dimer level at admission (median [IQR])     | 1.15 [0.60, 1.70]              | N.A.                  | 0.94 [0.94, 0.94]             |
| CRP level at admission (mean (SD))            | 101.74 (64.56)                 | N.A.                  | 211.10 (1.98)                 |

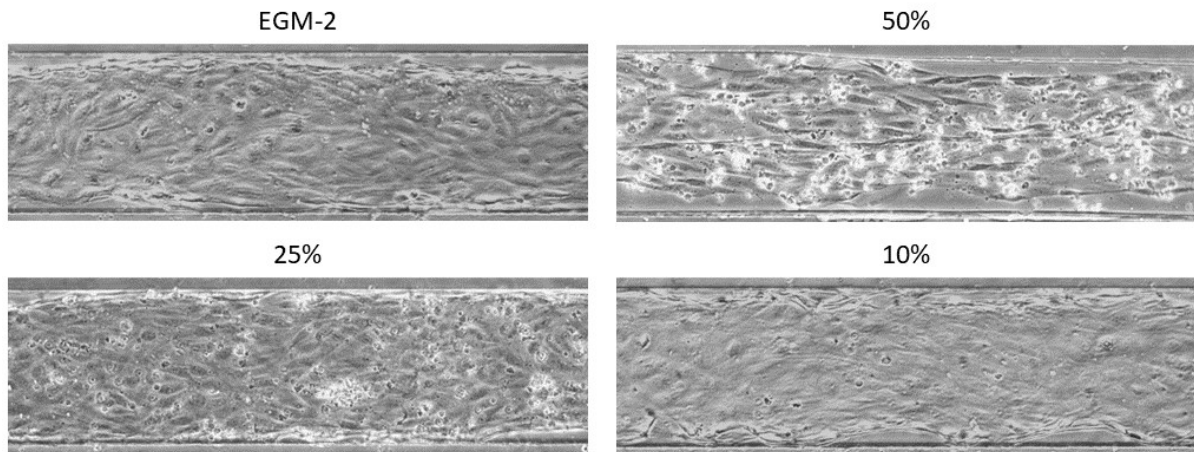

Figure S3: Monolayer comparison of different healthy plasma concentrations diluted in EGM-2 medium.

Table S2: Raw reads of homo sapiens RNA and SARS-CoV-2 RNA within stimulated HiPSC-ECs.

| Sample  | Raw reads homo sapiens | % reads homo sapiens | Raw reads SARS-CoV-2 | % reads SARS-CoV-2 |
|---------|------------------------|----------------------|----------------------|--------------------|
| CoV 1   | 21914342               | 99,81                | 372                  | 0                  |
| CoV 2   | 27280460               | 99,81                | 480                  | 0                  |
| CoV 3   | 26288451               | 99,82                | 482                  | 0                  |
| CoV 4   | 24462926               | 99,81                | 436                  | 0                  |
| CoV 5   | 24583042               | 99,81                | 415                  | 0                  |
| CoV 6   | 23019349               | 99,43                | 372                  | 0                  |
| CoV 7   | 18660879               | 99,79                | 322                  | 0                  |
| CoV 8   | 23805085               | 99,83                | 372                  | 0                  |
| CoV 9   | 30513988               | 99,79                | 630                  | 0                  |
| CoV 10  | 22316243               | 99,83                | 475                  | 0                  |
| CoV 11  | 27827534               | 99,81                | 361                  | 0                  |
| CoV 12  | 23467140               | 99,8                 | 331                  | 0                  |
| CTRL 1  | 26686603               | 99,81                | 382                  | 0                  |
| CTRL 2  | 25813854               | 99,82                | 449                  | 0                  |
| CTRL 3  | 26376322               | 99,78                | 714                  | 0                  |
| CTRL 4  | 23792058               | 99,82                | 436                  | 0                  |
| CTRL 5  | 25543298               | 99,8                 | 375                  | 0                  |
| CTRL 6  | 24486504               | 99,8                 | 394                  | 0                  |
| CTRL 7  | 28959628               | 99,8                 | 453                  | 0                  |
| CTRL 8  | 26242141               | 99,84                | 474                  | 0                  |
| CTRL 9  | 27125928               | 99,82                | 420                  | 0                  |
| CTRL 10 | 21293307               | 99,83                | 270                  | 0                  |
| CTRL 11 | 25670817               | 99,8                 | 410                  | 0                  |
| CTRL 12 | 20117054               | 99,83                | 324                  | 0                  |
| Pn 1    | 23168683               | 99,78                | 420                  | 0                  |
| Pn 2    | 22897147               | 99,83                | 368                  | 0                  |

Table S3: Top 10 upregulated gene ontology terms.

|    | GO         | Term                                            | Ont | N   | Up | Down | P.Up     | P.Down   |
|----|------------|-------------------------------------------------|-----|-----|----|------|----------|----------|
| 1  | GO:0048525 | negative regulation of viral process            | BP  | 69  | 25 | 1    | 7,97E-26 | 0,796733 |
| 2  | GO:0140546 | defense response to symbiont                    | BP  | 179 | 35 | 5    | 1,55E-25 | 0,38606  |
| 3  | GO:0051607 | defense response to virus                       | BP  | 179 | 35 | 5    | 1,55E-25 | 0,38606  |
| 4  | GO:0009615 | response to virus                               | BP  | 255 | 39 | 8    | 3,12E-24 | 0,226206 |
| 5  | GO:1903900 | regulation of viral life cycle                  | BP  | 111 | 27 | 1    | 1,45E-22 | 0,923254 |
| 6  | GO:0050792 | regulation of viral process                     | BP  | 126 | 28 | 1    | 3,35E-22 | 0,945845 |
| 7  | GO:0045087 | innate immune response                          | BP  | 429 | 43 | 7    | 2,65E-19 | 0,861749 |
| 8  | GO:0043207 | response to external biotic stimulus            | BP  | 764 | 57 | 16   | 2,78E-19 | 0,671997 |
| 9  | GO:0051707 | response to other organism                      | BP  | 764 | 57 | 16   | 2,78E-19 | 0,671997 |
| 10 | GO:0045071 | negative regulation of viral genome replication | BP  | 41  | 17 | 0    | 4,14E-19 | 1        |

Table S4: Top 10 downregulated gene ontology terms.

|    | GO         | Term                                   | Ont | N    | Up  | Down | P.Up     | P.Down   |
|----|------------|----------------------------------------|-----|------|-----|------|----------|----------|
| 1  | GO:0043413 | macromolecule glycosylation            | BP  | 177  | 0   | 17   | 1        | 5,89E-07 |
| 2  | GO:0006486 | protein glycosylation                  | BP  | 177  | 0   | 17   | 1        | 5,89E-07 |
| 3  | GO:0070085 | glycosylation                          | BP  | 187  | 0   | 17   | 1        | 1,28E-06 |
| 4  | GO:0005887 | integral component of plasma membrane  | CC  | 835  | 21  | 38   | 0,12837  | 3,30E-05 |
| 5  | GO:0016021 | integral component of membrane         | CC  | 2881 | 52  | 95   | 0,731946 | 4,18E-05 |
| 6  | GO:0031224 | intrinsic component of membrane        | CC  | 2965 | 55  | 97   | 0,655396 | 4,57E-05 |
| 7  | GO:0009986 | cell surface                           | CC  | 461  | 13  | 25   | 0,110568 | 5,40E-05 |
| 8  | GO:0071944 | cell periphery                         | CC  | 3353 | 68  | 106  | 0,337583 | 7,23E-05 |
| 9  | GO:0031226 | intrinsic component of plasma membrane | CC  | 883  | 23  | 38   | 0,087122 | 0,000109 |
| 10 | GO:0023052 | signaling                              | BP  | 3838 | 108 | 115  | 2,92E-06 | 0,000312 |

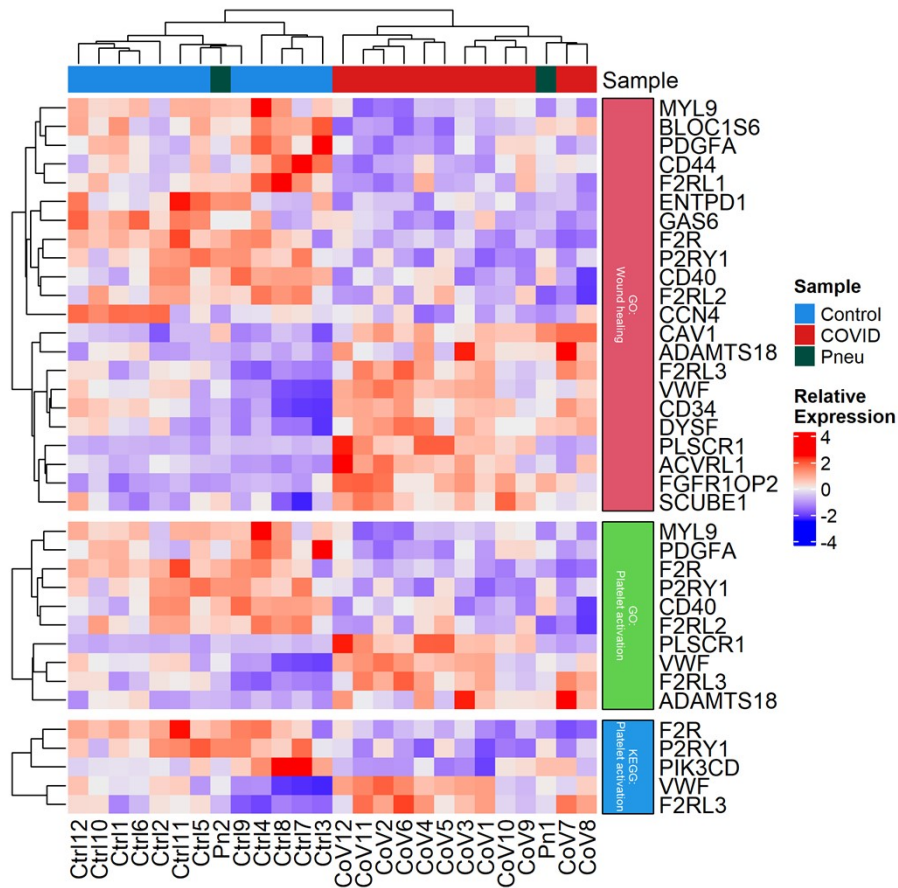

Figure S4: Gene ontologies of Wound healing and platelet activation.

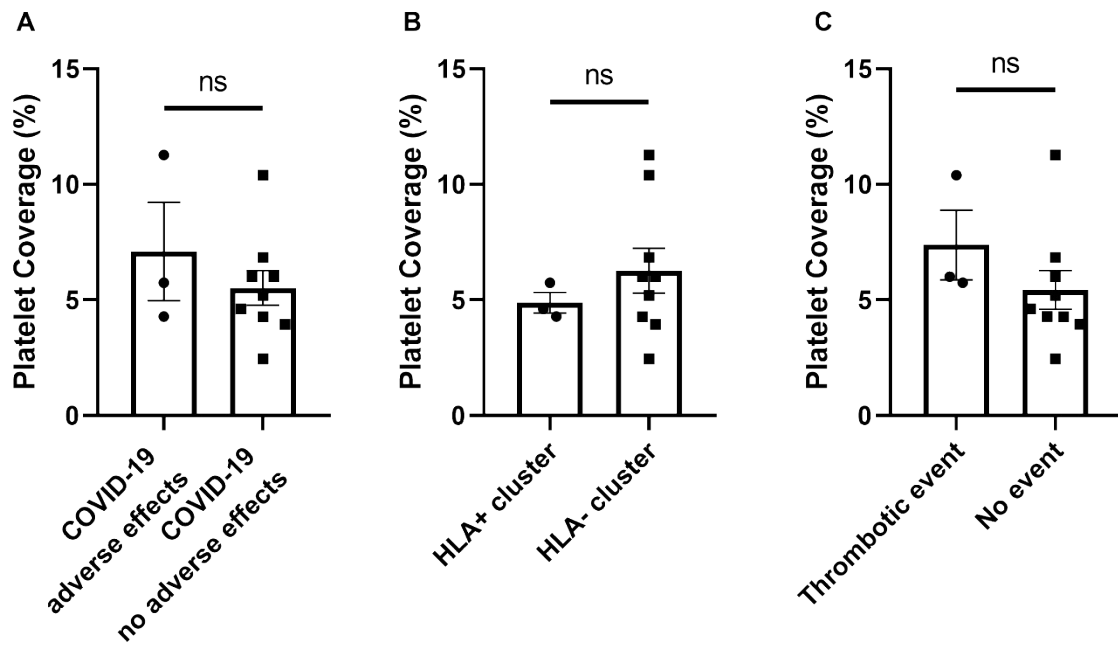

Figure S5: Platelet coverage in COVID-19 patients separated by A:adverse effects (ICU, death), B: elevated HLA class I expression, or C: Venous thromboembolism. Platelet coverage is determined using image analysis of fluorescence microscopy data. Error bars: SEM. ns: Non significant.
